# Supplementary material for: Exploring the Complexity of the HIV-1 Fitness Landscape
Source: PubMed Central journal article supplement (PMC3297571; doi:10.1371/journal.pgen.1002551), 2012-03-08

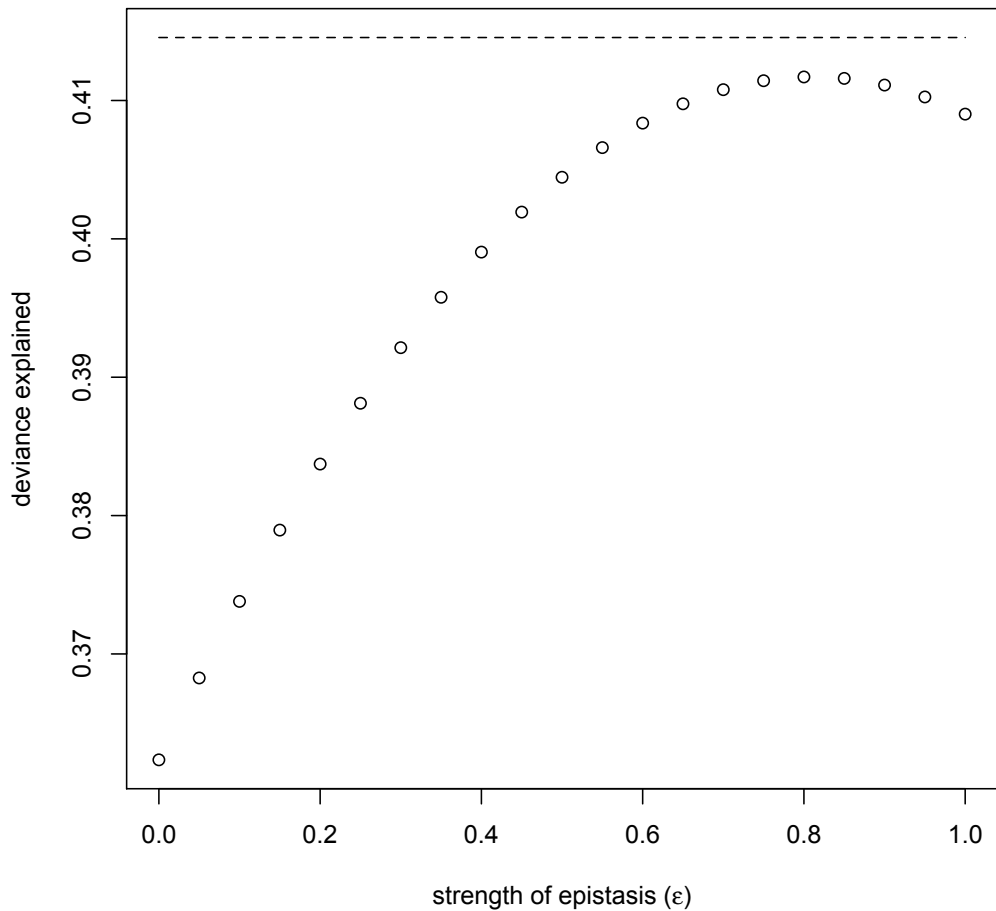

Supplement: pgen.1002551.s001.pdf [file pgen.1002551.s001.pdf]
